# Supplementary material
Source: publisher site journal article supplement (https://www.spandidos-publications.com/4753/downloadSupplementary)

Figure S1. Correlation between the expression of (A) *TCEA3* and miR-1225-3p, (B) *TCEA3* and miR-1233-3p and (C) between *LITD1* and miR-1303. Cq, quantification cycle; miRNA, microRNA.

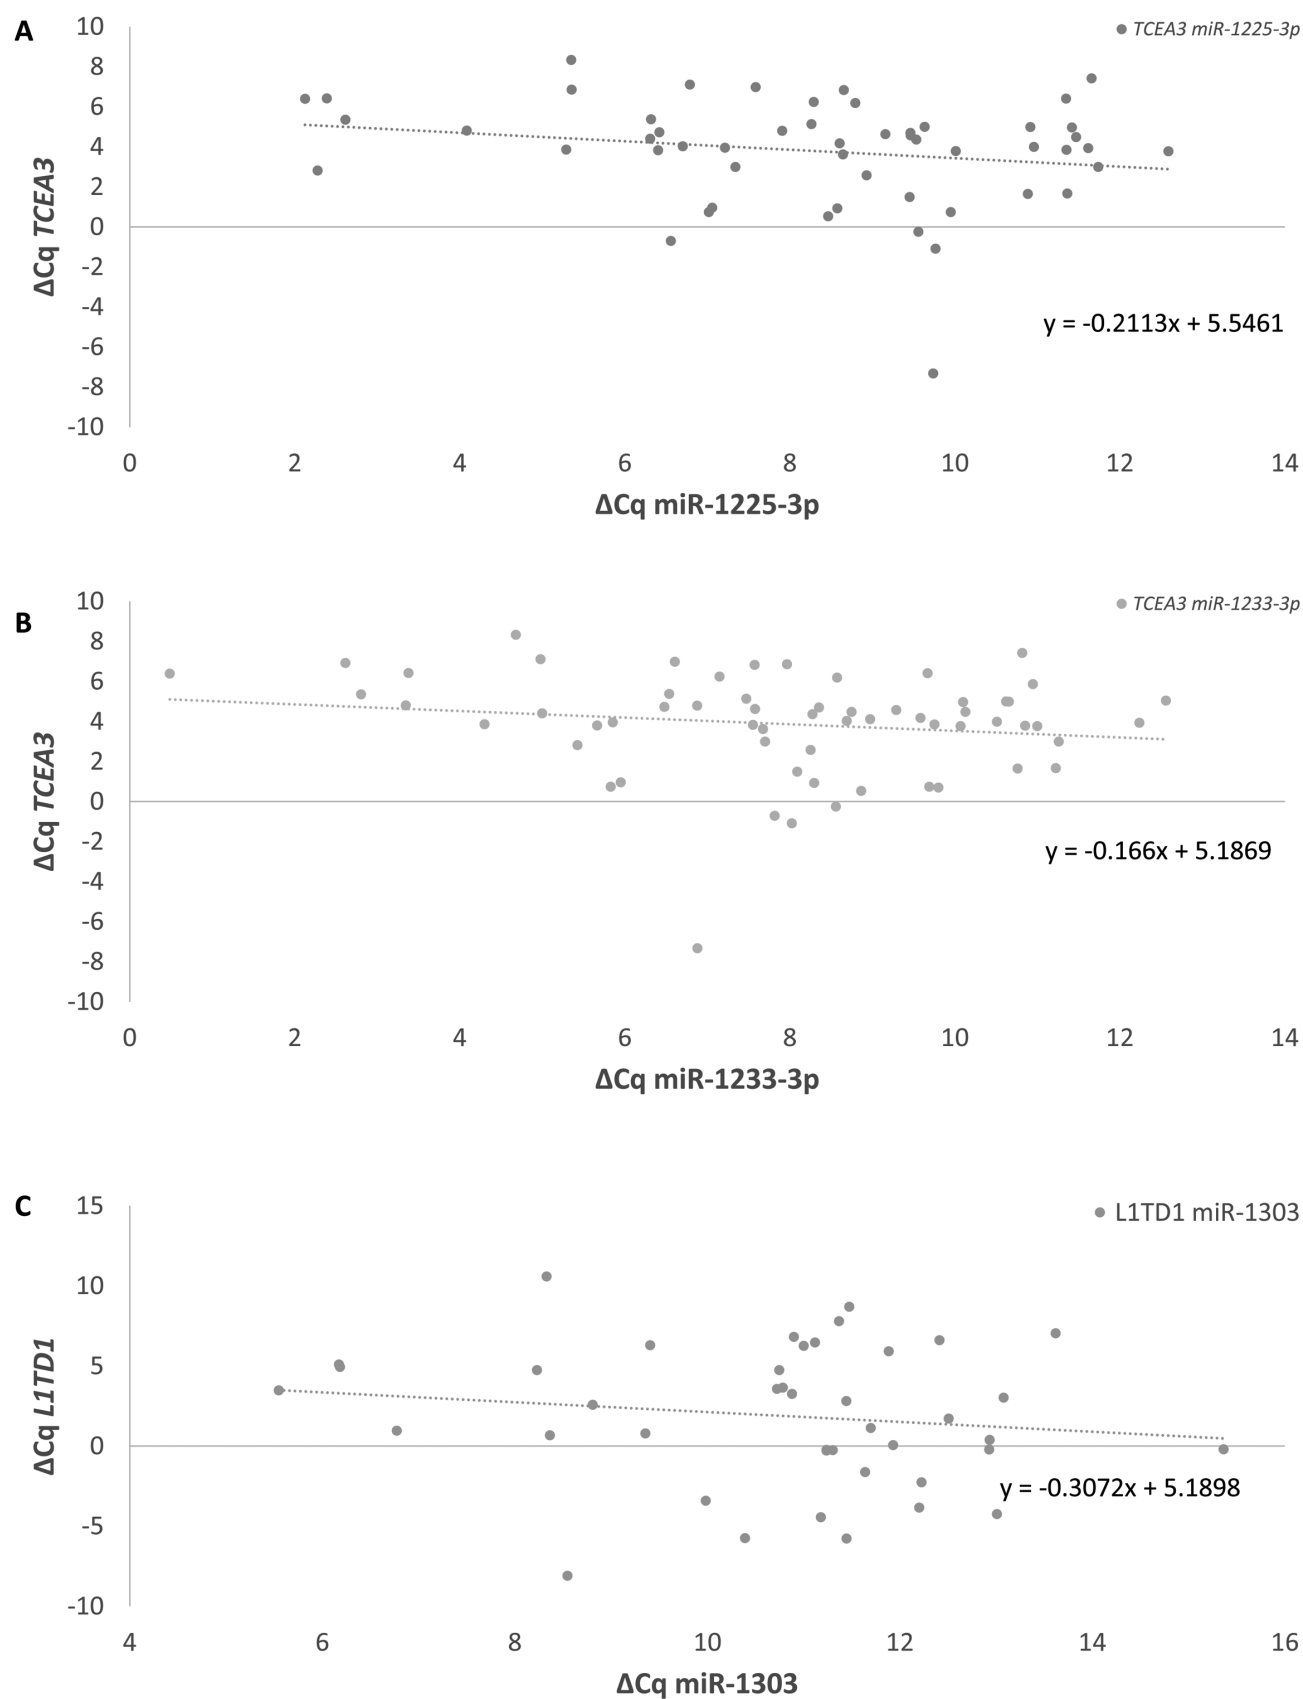

Supplement: Supplementary file 1 [file downloadSupplementary]
